# Supplementary material for: Contrasting Transcriptional Responses of a Virulent and an Attenuated Strain of Mycobacterium tuberculosis Infecting Macrophages
Source: PLoS One. 2010 Jun 10;5(6):e11066. doi: 10.1371/journal.pone.0011066 (PMC2883559; doi:10.1371/journal.pone.0011066)
Supplement: Table S2 — Common H37Ra and H37Rv response to the intracellular environment. Significantly differentially expressed genes were identified using a t-test (p<0.05) with Benjamani and Hochberg multiple testing correction and further filtered to include genes with >1.5 fold change in both intracellular H37Ra compared to broth grown H37Ra, and intracellular H37Rv compared to broth grown H37Rv. (0.05 MB XLS) [file pone.0011066.s003.xls]

## Sheet: Supplemental 2
Supplemental table 2: Common H37Ra and H37Rv response to the intracellular environment.
Significantly differentially expressed genes were identified using a t-test (p<0.05) with Benjamani and Hochberg multiple testing correction and further filtered to include genes with >1.5 fold change in both intracellular H37Ra compared to broth grown H37Ra, and intracellular H37Rv compared to broth grown H37Rv.
Commonly induced genes in intracellular bacteria
Systematic name	Common Name	Fold induction in H37Rv	P-value	Fold-induction in H37Ra	P-value	Product
MtH37Rv-0061 (1E8)	Rv0061	2.87499	0.000100399	1.89975	0.00317013	HYPOTHETICAL PROTEIN
MtH37Rv-0145 (8I4)	Rv0145	1.62061	0.000275139	1.55659	0.000842682	CONSERVED HYPOTHETICAL PROTEIN
MtH37Rv-0146 (8J4)	Rv0146	2.0443	8.80206e-05	1.71868	6.17645e-06	CONSERVED HYPOTHETICAL PROTEIN
MtH37Rv-0244c (8L7)	fadE5	1.80858	0.000176075	2.20831	1.56984e-06	PROBABLE ACYL-COA DEHYDROGENASE FADE5
MtH37Rv-0270 (2I15)	fadD2	1.84084	0.00449091	1.79342	0.00214417	PROBABLE FATTY-ACID-COA LIGASE FADD2 (FATTY-ACID-COA SYNTHETASE) (FATTY-ACID-COA SYNTHASE)
MtH37Rv-0281 (8I9)	Rv0281	1.54019	0.000115917	1.85408	0.00141304	CONSERVED HYPOTHETICAL PROTEIN
MtH37Rv-0282 (2P15)	Rv0282	4.12319	0.000420681	3.79678	5.45771e-05	CONSERVED HYPOTHETICAL PROTEIN
MtH37Rv-0283 (2I16)	Rv0283	3.15099	0.000133952	3.66516	0.000866653	POSSIBLE CONSERVED MEMBRANE PROTEIN
MtH37Rv-0284 (2J16)	Rv0284	6.34792	2.13418e-10	4.82315	6.5078e-08	POSSIBLE CONSERVED MEMBRANE PROTEIN
MtH37Rv-0286 (2K16)	PPE4	3.34005	2.34974e-05	3.25865	0.000297159	PPE FAMILY PROTEIN
MtH37Rv-0288 (8L9)	cfp7	5.39426	0.00104521	3.70257	0.00136821	Low molecular weight protein antigen 7 cfp7 (10 kDa antigen) (CFP-7) (Protein TB10.4)
MtH37Rv-0289 (2L16)	Rv0289	4.01359	0.000240422	3.81766	0.00132895	CONSERVED HYPOTHETICAL PROTEIN
MtH37Rv-0290 (2M16)	Rv0290	2.65541	0.000151135	3.60672	2.04302e-05	PROBABLE CONSERVED TRANSMEMBRANE PROTEIN
MtH37Rv-0292 (2N16)	Rv0292	3.47364	1.86873e-07	3.02217	3.83414e-09	PROBABLE CONSERVED TRANSMEMBRANE PROTEIN
MtH37Rv-0300 (8I10)	Rv0300	1.78597	0.000138343	1.53299	0.00367646	CONSERVED HYPOTHETICAL PROTEIN
MtH37Rv-0451c (1B20)	mmpS4	3.48652	3.91863e-05	2.02202	0.00275542	PROBABLE CONSERVED MEMBRANE PROTEIN MMPS4
MtH37Rv-0465c (1B21)	Rv0465c	1.82489	0.00214987	1.62801	9.64965e-06	PROBABLE TRANSCRIPTIONAL REGULATORY PROTEIN
MtH37Rv-0467 (9O14)	icl	3.34915	0.00129692	6.63341	4.34306e-06	ISOCITRATE LYASE ICL (ISOCITRASE) (ISOCITRATASE)
MtH37Rv-0468 (1D21)	fadB2	1.90307	0.00297027	1.89305	0.000519214	PROBABLE 3-HYDROXYBUTYRYL-COA DEHYDROGENASE FADB2 (BETA-HYDROXYBUTYRYL-COA DEHYDROGENASE) (BHBD)
MtH37Rv-0469 (9P14)	umaA	2.49137	0.000181417	1.59636	0.000266828	POSSIBLE MYCOLIC ACID SYNTHASE UMAA
MtH37Rv-0481c (1E22)	Rv0481c	2.09885	0.00120625	1.55178	0.00441499	HYPOTHETICAL PROTEIN
MtH37Rv-0639 (9J22)	nusG	2.20371	0.000795207	1.47583	0.00321673	PROBABLE TRANSCRIPTION ANTITERMINATION PROTEIN NUSG
MtH37Rv-0885 (4L6)	Rv0885	2.40227	2.69581e-06	1.70629	0.000331499	CONSERVED HYPOTHETICAL PROTEIN
MtH37Rv-1032c (8E14)	trcS	1.97495	4.77223e-05	1.59122	0.00153427	TWO COMPONENT SENSOR HISTIDINE KINASE TRCS
MtH37Rv-1033c (8F14)	trcR	2.54948	0.000178638	1.83887	0.000437998	TWO COMPONENT TRANSCRIPTIONAL REGULATOR TRCR
MtH37Rv-1223 (8C23)	htrA	2.26843	7.28799e-07	1.51453	0.00162112	PROBABLE SERINE PROTEASE HTRA (DEGP PROTEIN)
MtH37Rv-1229c (8E23)	mrp	1.48445	0.00411354	1.53978	0.0019544	PROBABLE MRP-RELATED PROTEIN MRP
MtH37Rv-1295 (7K11)	thrC	2.14554	0.0124447	1.61605	0.00191363	PROBABLE THREONINE SYNTHASE THRC
MtH37Rv-1331 (9F8)	Rv1331	1.85093	0.00049469	1.54744	0.00210077	CONSERVED HYPOTHETICAL PROTEIN
MtH37Rv-1343c (7A22)	lprD	2.52459	0.000912336	2.3977	0.00348883	PROBABLE CONSERVED LIPOPROTEIN LPRD
MtH37Rv-1344 (9H8)	Rv1344	6.85346	0.000140806	6.24281	5.30129e-05	PROBABLE ACYL CARRIER PROTEIN (ACP)
MtH37Rv-1345 (7B22)	fadD33	2.23972	1.10055e-06	3.55242	5.99367e-07	POSSIBLE POLYKETIDE SYNTHASE FADD33
MtH37Rv-1346 (7C22)	fadE14	2.48061	0.0181441	3.12043	0.00129526	POSSIBLE ACYL-COA DEHYDROGENASE FADE14
MtH37Rv-1348 (7E22)	Rv1348	2.06486	8.13838e-07	2.03595	0.000248919	PROBABLE DRUGS-TRANSPORT TRANSMEMBRANE ATP-BINDING PROTEIN ABC TRANSPORTER
MtH37Rv-1352 (9A9)	Rv1352	1.83081	0.00029138	2.14438	6.32929e-06	CONSERVED HYPOTHETICAL PROTEIN
MtH37Rv-1395 (5M3)	Rv1395	1.66294	0.0155519	2.11161	0.00041409	PROBABLE TRANSCRIPTIONAL REGULATORY PROTEIN
MtH37Rv-1460 (5K9)	Rv1460	2.77334	1.35307e-05	2.64533	3.58058e-05	PROBABLE TRANSCRIPTIONAL REGULATORY PROTEIN
MtH37Rv-1461 (5L9)	Rv1461	3.04612	0.000533758	3.67379	0.000340642	CONSERVED HYPOTHETICAL PROTEIN
MtH37Rv-1462 (5M9)	Rv1462	1.90089	0.00764708	1.93815	0.00293527	CONSERVED HYPOTHETICAL PROTEIN
MtH37Rv-1463 (5N9)	Rv1463	4.41937	2.70628e-06	3.55598	1.20296e-09	PROBABLE CONSERVED ATP-BINDING PROTEIN ABC TRANSPORTER
MtH37Rv-1465 (5P9)	Rv1465	1.8067	7.91968e-05	2.31153	1.07838e-05	POSSIBLE NITROGEN FIXATION RELATED PROTEIN
MtH37Rv-1519 (10H20)	Rv1519	3.39678	1.36479e-06	2.53382	2.93886e-05	CONSERVED HYPOTHETICAL PROTEIN
MtH37Rv-1520 (10A21)	Rv1520	2.15032	6.21622e-05	1.52813	0.00218027	probable sugar transferase
MtH37Rv-1592c (5B20)	Rv1592c	1.81921	0.00437778	1.61124	0.00172245	CONSERVED HYPOTHETICAL PROTEIN
MtH37Rv-1596 (5E20)	nadC	1.65365	0.00409498	1.56538	0.00366326	Probable nicotinate-nucleotide pyrophosphatase nadC
MtH37Rv-1630 (5E24)	rpsA	2.3735	0.0132933	1.64226	0.00454371	Probable ribosomal protein S1 RpsA
MtH37Rv-1821 (7N16)	secA2	1.80437	0.000724969	1.52958	0.000235072	POSSIBLE PREPROTEIN TRANSLOCASE SECA2
MtH37Rv-1856c (7B8)	Rv1856c	1.93307	0.000307879	1.50511	0.00428044	HYPOTHETICAL OXIDOREDUCTASE
MtH37Rv-1990c (9M8)	Rv1990c	1.84013	0.00457093	2.39987	0.00299575	PROBABLE TRANSCRIPTIONAL REGULATORY PROTEIN
MtH37Rv-1992c (6O13)	ctpG	1.52917	0.000287143	3.85248	0.000205651	PROBABLE METAL CATION TRANSPORTER P-TYPE ATPASE G CTPG
MtH37Rv-2352c (8I16)	PPE38	2.64694	0.000251688	4.26389	2.69134e-05	PPE FAMILY PROTEIN
MtH37Rv-2377c (8L17)	mbtH	3.64623	0.000175057	2.18705	0.000791375	PUTATIVE CONSERVED PROTEIN MBTH
MtH37Rv-2379c (6E5)	mbtF	4.53462	1.59462e-09	3.11242	0.000353773	PEPTIDE SYNTHETASE MBTF (PEPTIDE SYNTHASE)
MtH37Rv-2380c (6F5)	mbtE	3.65074	0.000667267	3.27661	5.27146e-05	PEPTIDE SYNTHETASE MBTE (PEPTIDE SYNTHASE)
MtH37Rv-2381c (6G5)	mbtD	3.42958	0.000959923	2.98204	0.00015072	POLYKETIDE SYNTHETASE MBTD (POLYKETIDE SYNTHASE)
MtH37Rv-2383c (6A6)	mbtB	3.16217	6.38498e-05	3.68552	3.87723e-05	PHENYLOXAZOLINE SYNTHASE MBTB (PHENYLOXAZOLINE SYNTHETASE)
MtH37Rv-2386c (6D6)	mbtI	4.4262	0.00018748	4.82283	1.76026e-08	PUTATIVE ISOCHORISMATE SYNTHASE MBTI
MtH37Rv-2428 (6C10)	ahpC	10.9842	0.000111558	3.224	0.000445326	ALKYL HYDROPEROXIDE REDUCTASE C PROTEIN AHPC (ALKYL HYDROPEROXIDASE C)
MtH37Rv-2429 (6D10)	ahpD	3.56423	4.38769e-06	1.92966	0.00516412	ALKYL HYDROPEROXIDE REDUCTASE D PROTEIN AHPD (ALKYL HYDROPEROXIDASE D)
MtH37Rv-2430c (6E10)	PPE41	3.13806	2.20577e-06	1.74959	0.00389058	PPE FAMILY PROTEIN
MtH37Rv-2705c (10A5)	Rv2705c	2.14511	2.24639e-05	1.57339	0.00149543	CONSERVED HYPOTHETICAL PROTEIN
MtH37Rv-2706c (10B5)	Rv2706c	2.83973	1.57501e-05	1.70687	9.2466e-05	HYPOTHETICAL PROTEIN
MtH37Rv-2710 (10D5)	sigB	3.27712	1.90733e-07	2.33841	0.00335869	RNA POLYMERASE SIGMA FACTOR SIGB
MtH37Rv-2789c (10E7)	fadE21	1.66031	0.000189675	1.50549	0.000430544	PROBABLE ACYL-COA DEHYDROGENASE FADE21
MtH37Rv-2791c (10F7)	Rv2791c	1.54451	0.0034137	1.57443	0.000186838	PROBABLE TRANSPOSASE
MtH37Rv-2930 (10F12)	fadD26	2.15809	0.000645417	1.55174	0.00454734	FATTY-ACID-COA LIGASE FADD26 (FATTY-ACID-COA SYNTHETASE) (FATTY-ACID-COA SYNTHASE)
MtH37Rv-3019c (10P3)	Rv3019c	3.94475	0.0015384	3.69253	0.000542317	PUTATIVE SECRETED ESAT-6 LIKE PROTEIN 9
MtH37Rv-3020c (10I4)	PE28	4.45656	0.000385219	3.66498	0.000636452	PE FAMILY PROTEIN
MtH37Rv-3083 (10I6)	Rv3083	2.01578	1.96234e-05	1.77115	0.000644486	PROBABLE MONOOXYGENASE (HYDROXYLASE)
MtH37Rv-3140 (10O8)	fadE23	2.2677	0.00318126	2.85058	0.00142776	PROBABLE ACYL-COA DEHYDROGENASE FADE23
MtH37Rv-3229c (3P9)	Rv3229c	2.17703	0.012564	3.91669	3.91087e-05	POSSIBLE LINOLEOYL-COA DESATURASE (DELTA(6)-DESATURASE)
MtH37Rv-3402c (4A13)	Rv3402c	4.58909	1.69397e-06	3.86387	5.16233e-07	CONSERVED HYPOTHETICAL PROTEIN
MtH37Rv-3403c (4B13)	Rv3403c	2.46929	0.000392111	2.60624	0.00109116	HYPOTHETICAL PROTEIN
MtH37Rv-3407 (9G23)	Rv3407	2.01765	0.00779413	1.65172	1.65009e-06	CONSERVED HYPOTHETICAL PROTEIN
MtH37Rv-3515c (4E22)	fadD19	2.1522	5.33901e-05	1.99136	2.20635e-05	PROBABLE FATTY-ACID-COA LIGASE FADD19 (FATTY-ACID-COA SYNTHETASE) (FATTY-ACID-COA SYNTHASE)
MtH37Rv-3526 (4G23)	Rv3526	1.97674	0.000924406	1.90966	0.000914467	POSSIBLE OXIDOREDUCTASE
MtH37Rv-3583c (10L24)	Rv3583c	2.19755	0.0015793	2.49641	0.00369149	POSSIBLE TRANSCRIPTION FACTOR
MtH37Rv-3588c (2E17)	Rv3588c	2.87062	8.50386e-07	2.74793	9.10417e-07	CARBONIC ANHYDRASE (CARBONATE DEHYDRATASE) (CARBONIC DEHYDRATASE)
MtH37Rv-3839 (8E4)	Rv3839	7.14976	2.60404e-05	10.5472	6.1481e-07	CONSERVED HYPOTHETICAL PROTEIN
MtH37Rv-3840 (8F4)	Rv3840	1.5906	0.000619985	1.87183	6.92761e-06	POSSIBLE TRANSCRIPTIONAL REGULATORY PROTEIN
MtH37Rv-3854c (11C9)	ethA	1.85897	0.000456506	1.53644	0.00150137	MONOOXYGENASE ETHA
Commonly repressed genes in intracellular bacteria
Systematic name	Common Name	Fold induction in H37Rv	P-value	Fold-induction in H37Ra	P-value	Product
MtH37Rv-0974c (5D2)	accD2	0.383413	0.00019886	0.413476	3.32696e-06	PROBABLE ACETYL-/PROPIONYL-COA CARBOXYLASE (BETA SUBUNIT) ACCD2
MtH37Rv-1475c (5K10)	acn	0.558429	0.000481286	0.605106	0.000437444	PROBABLE ACONITATE HYDRATASE ACN (Citrate hydro-lyase) (Aconitase)
MtH37Rv-3841 (8G4)	bfrB	0.211574	8.77943e-09	0.222622	0.0002857	POSSIBLE BACTERIOFERRITIN BFRB
MtH37Rv-0806c (3P23)	cpsY	0.507539	0.00188762	0.473446	0.00352101	POSSIBLE UDP-GLUCOSE-4-EPIMERASE CPSY (GALACTOWALDENASE) (UDP-GALACTOSE-4-EPIMERASE) (URIDINE DIPHOSPHATE GALACTOSE-4-EPIMERASE) (URIDINE DIPHOSPHO-GALACTOSE-4-EPIMERASE)
MtH37Rv-3059 (3H18)	cyp136	0.565338	0.000303102	0.416084	0.00246557	PROBABLE CYTOCHROME P450 136 CYP136
MtH37Rv-3330 (4A8)	dacB1	0.610817	0.011086	0.441183	0.000349622	PROBABLE PENICILLIN-BINDING PROTEIN DACB1 (D-ALANYL-D-ALANINE CARBOXYPEPTIDASE) (DD-PEPTIDASE) (DD-CARBOXYPEPTIDASE) (PBP) (DD-TRANSPEPTIDASE) (SERINE-TYPE D-ALA-D-ALA CARBOXYPEPTIDASE) (D-AMINO ACID HYDROLASE)
MtH37Rv-3056 (3E18)	dinP	0.551875	0.000951451	0.643255	1.06135e-05	POSSIBLE DNA-DAMAGE-INDUCIBLE PROTEIN P DINP
MtH37Rv-0099 (1K1)	fadD10	0.455915	6.6823e-07	0.450448	0.000223759	POSSIBLE FATTY-ACID-COA LIGASE FADD10 (FATTY-ACID-COA SYNTHETASE) (FATTY-ACID-COA SYNTHASE)
MtH37Rv-1550 (10E22)	fadD11	0.466482	0.000620445	0.640429	0.000309664	PROBABLE FATTY-ACID-COA LIGASE FADD11 (FATTY-ACID-COA SYNTHETASE) (FATTY-ACID-COA SYNTHASE)
MtH37Rv-1058 (5G9)	fadD14	0.439341	0.000140354	0.527371	5.09969e-05	PROBABLE MEDIUM CHAIN FATTY-ACID-COA LIGASE FADD14 (FATTY-ACID-COA SYNTHETASE) (FATTY-ACID-COA SYNTHASE)
MtH37Rv-0975c (8B13)	fadE13	0.486969	0.00294041	0.578197	0.00331171	PROBABLE ACYL-COA DEHYDROGENASE FADE13
MtH37Rv-3696c (3B3)	glpK	0.487859	0.000372992	0.586941	0.00141474	GLYCEROL KINASE GLPK (ATP:GLYCEROL 3-PHOSPHOTRANSFERASE)(GLYCEROKINASE) (GK)
MtH37Rv-2761c (2B4)	hsdS	0.491571	0.00394282	0.526959	0.00143497	POSSIBLE TYPE I RESTRICTION/MODIFICATION SYSTEM SPECIFICITY DETERMINANT HSDS (S PROTEIN)
MtH37Rv-2485c (6D15)	lipQ	0.497047	2.59578e-05	0.449933	0.00236713	PROBABLE CARBOXYLESTERASE LIPQ
MtH37Rv-3298c (4C5)	lpqC	0.294171	0.000601725	0.39312	0.000692444	POSSIBLE ESTERASE LIPOPROTEIN LPQC
MtH37Rv-0604 (9O19)	lpqO	0.547396	1.05684e-05	0.619274	4.6172e-05	PROBABLE CONSERVED LIPOPROTEIN LPQO
MtH37Rv-2873 (10H10)	mpt83	0.49517	2.31172e-06	0.4592	0.00128941	CELL SURFACE LIPOPROTEIN MPT83 PRECURSOR (LIPOPROTEIN P23)
MtH37Rv-3152 (3L2)	nuoH	0.597072	1.1088e-05	0.490535	5.54105e-05	PROBABLE NADH DEHYDROGENASE I (CHAIN H) NUOH (NADH-UBIQUINONE OXIDOREDUCTASE CHAIN H)
MtH37Rv-0978c (8D13)	PE_PGRS17	0.298438	0.000397285	0.56031	0.00432746	PE-PGRS FAMILY PROTEIN
MtH37Rv-3097c (3C22)	PE30	0.312307	0.0007857	0.513668	0.000336859	PE-PGRS FAMILY PROTEIN, PROBABLY TRIACYLGLYCEROL LIPASE (ESTERASE/LIPASE) (TRIGLYCERIDE LIPASE) (TRIBUTYRASE)
MtH37Rv-3622c (11B2)	PE32	0.530044	0.0050167	0.646451	0.00103537	PE FAMILY PROTEIN
MtH37Rv-3068c (3F19)	pgmA	0.517319	0.000524231	0.63768	0.000289819	PROBABLE PHOSPHOGLUCOMUTASE PGMA (GLUCOSE PHOSPHOMUTASE) (PGM)
MtH37Rv-1663 (9P1)	pks17	0.519788	0.00189982	0.699508	5.99522e-05	Probable polyketide synthase pks17
MtH37Rv-0780 (3N21)	purC	0.481922	0.00149872	0.597741	0.00352049	PHOSPHORIBOSYLAMINOIMIDAZOLE- SUCCINOCARBOXAMIDE SYNTHASE PURC (SAICAR SYNTHETASE)
MtH37Rv-3585 (2B17)	radA	0.508266	0.000773579	0.631103	0.00356273	DNA REPAIR PROTEIN RADA (DNA REPAIR PROTEIN SMS)
MtH37Rv-0097 (1I1)	Rv0097	0.409775	0.000624648	0.478481	0.000195679	POSSIBLE OXIDOREDUCTASE
MtH37Rv-0138 (8J3)	Rv0138	0.640036	0.00110238	0.650697	0.00088012	CONSERVED HYPOTHETICAL PROTEIN
MtH37Rv-0839 (4L2)	Rv0839	0.285269	0.000417853	0.304754	0.00264565	CONSERVED HYPOTHETICAL PROTEIN
MtH37Rv-0843 (4P2)	Rv0843	0.324288	0.00121997	0.354607	0.000261664	PROBABLE DEHYDROGENASE
MtH37Rv-0888 (4O6)	Rv0888	0.48432	0.000246251	0.314773	0.000505106	PROBABLE EXPORTED PROTEIN
MtH37Rv-0920c (4M9)	Rv0920c	0.535284	0.00952317	0.489407	0.00015886	PROBABLE TRANSPOSASE
MtH37Rv-0939 (4P10)	Rv0939	0.470048	7.36586e-05	0.379449	6.02937e-05	POSSIBLE BIFUNCTIONAL ENZYME: 2-HYDROXYHEPTA-2,4-DIENE-1,7-DIOATE ISOMERASE (HHDD ISOMERASE) + CYCLASE/DEHYDRASE
MtH37Rv-1120c (7P2)	Rv1120c	0.547295	7.294e-05	0.423241	0.00037564	CONSERVED HYPOTHETICAL PROTEIN
MtH37Rv-1230c (7E17)	Rv1230c	0.52761	9.34965e-05	0.490623	0.000320078	POSSIBLE MEMBRANE PROTEIN
MtH37Rv-1251c (7J7)	Rv1251c	0.486001	0.00187484	0.579768	0.0037176	CONSERVED HYPOTHETICAL PROTEIN
MtH37Rv-1482c (5P10)	Rv1482c	0.331443	0.00107509	0.383476	0.0024733	CONSERVED HYPOTHETICAL PROTEIN
MtH37Rv-1490 (5O11)	Rv1490	0.582768	0.00688124	0.589263	0.000374813	PROBABLE MEMBRANE PROTEIN
MtH37Rv-1503c (10B20)	Rv1503c	0.458126	0.00412609	0.429813	0.000456798	CONSERVED HYPOTHETICAL PROTEIN
MtH37Rv-1776c (7I13)	Rv1776c	0.626437	0.00034059	0.625792	0.000372636	POSSIBLE TRANSCRIPTIONAL REGULATORY PROTEIN
MtH37Rv-2047c (6L18)	Rv2047c	0.423417	0.000321356	0.453315	0.00156161	conserved hypothetical protein
MtH37Rv-2304c (8K14)	Rv2304c	0.586191	0.00465671	0.585757	0.000181912	HYPOTHETICAL PROTEIN
MtH37Rv-2510c (6G17)	Rv2510c	0.509259	0.00746214	0.53745	0.00303486	CONSERVED HYPOTHETICAL PROTEIN
MtH37Rv-2513 (6A18)	Rv2513	0.576679	0.00644699	0.550623	0.00379039	HYPOTHETICAL PROTEIN
MtH37Rv-2531c (6G19)	Rv2531c	0.508148	0.000865017	0.543111	0.00308634	PROBABLE AMINO ACID DECARBOXYLASE
MtH37Rv-2787 (2E6)	Rv2787	0.530756	0.00330238	0.58899	0.00314617	CONSERVED HYPOTHETICAL ALANINE RICH PROTEIN
MtH37Rv-2824c (2B9)	Rv2824c	0.518142	0.000216638	0.61696	0.00351245	HYPOTHETICAL PROTEIN
MtH37Rv-2854 (2B12)	Rv2854	0.415315	0.000307739	0.610902	0.00227137	HYPOTHETICAL PROTEIN
MtH37Rv-2864c (2J1)	Rv2864c	0.414615	0.000136663	0.393884	0.00194864	POSSIBLE PENICILLIN-BINDING LIPOPROTEIN
MtH37Rv-2877c (2I2)	Rv2877c	0.384491	0.00173725	0.606099	0.00442304	PROBABLE CONSERVED INTEGRAL MEMBRANE PROTEIN
MtH37Rv-2959c (2L9)	Rv2959c	0.597634	0.000102601	0.376092	0.000465945	POSSIBLE METHYLTRANSFERASE (METHYLASE)
MtH37Rv-3165c (3N3)	Rv3165c	0.571248	0.000183452	0.623883	5.17981e-05	HYPOTHETICAL PROTEIN
MtH37Rv-3174 (3N4)	Rv3174	0.307295	0.00043823	0.426862	0.00377456	PROBABLE SHORT-CHAIN DEHYDROGENASE/REDUCTASE
MtH37Rv-3190c (3O5)	Rv3190c	0.520757	0.00434926	0.5239	0.000596344	HYPOTHETICAL PROTEIN
MtH37Rv-3263 (4F1)	Rv3263	0.41045	0.00514854	0.420503	0.00243086	PROBABLE DNA METHYLASE (MODIFICATION METHYLASE) (METHYLTRANSFERASE)
MtH37Rv-3278c (4C3)	Rv3278c	0.621913	0.00102602	0.647314	0.0042902	PROBABLE CONSERVED TRANSMEMBRANE PROTEIN
MtH37Rv-3292 (4E4)	Rv3292	0.603429	0.00316664	0.598014	0.00125212	CONSERVED HYPOTHETICAL PROTEIN
MtH37Rv-3304 (4F5)	Rv3304	0.554226	0.00142298	0.605627	0.00125343	CONSERVED HYPOTHETICAL PROTEIN
MtH37Rv-3342 (4B9)	Rv3342	0.376737	0.00221844	0.505955	0.00304464	POSSIBLE METHYLTRANSFERASE (METHYLASE)
MtH37Rv-3353c (4D9)	Rv3353c	0.427297	5.37812e-07	0.58449	0.000113954	CONSERVED HYPOTHETICAL PROTEIN
MtH37Rv-3368c (4D10)	Rv3368c	0.387729	7.66153e-06	0.558738	0.00445971	POSSIBLE OXIDOREDUCTASE
MtH37Rv-3371 (4G10)	Rv3371	0.350753	1.33314e-05	0.50761	0.00371261	CONSERVED HYPOTHETICAL PROTEIN
MtH37Rv-3618 (2A20)	Rv3618	0.467618	0.00532597	0.541887	0.00326502	POSSIBLE MONOOXYGENASE
MtH37Rv-3629c (2A21)	Rv3629c	0.484458	0.013818	0.615722	0.00219671	PROBABLE CONSERVED INTEGRAL MEMBRANE PROTEIN
MtH37Rv-3632 (11D2)	Rv3632	0.563799	0.000764915	0.468178	0.00209027	POSSIBLE CONSERVED MEMBRANE PROTEIN
MtH37Rv-3640c (2G21)	Rv3640c	0.363248	0.000984945	0.350141	0.000422284	PROBABLE TRANSPOSASE
MtH37Rv-3712 (3A5)	Rv3712	0.477462	0.00829922	0.558741	0.00091704	POSSIBLE LIGASE
MtH37Rv-3784 (3E11)	Rv3784	0.584988	0.0176826	0.529038	2.17528e-05	POSSIBLE dTDP-GLUCOSE 4,6-DEHYDRATASE
MtH37Rv-3796 (11B7)	Rv3796	0.547436	0.00519691	0.463247	0.00177425	CONSERVED HYPOTHETICAL PROTEIN
MtH37Rv-3897c (11C11)	Rv3897c	0.557867	0.00130647	0.578913	0.000357515	CONSERVED HYPOTHETICAL PROTEIN
MtH37Rv-0728c (3N17)	serA2	0.378247	0.000942404	0.596164	0.00276124	POSSIBLE D-3-PHOSPHOGLYCERATE DEHYDROGENASE SERA2 (PHOSPHOGLYCERATE DEHYDROGENASE) (PGDH)
